# Supplementary material for: The Identification and Cytotoxic Evaluation of Nutmeg (Myristica fragrans Houtt.) and Its Substituents
Source: MDPI journal article supplement (doi:10.3390/foods12234211), 2023-11-22
Supplement: s1 [file s1]

# Identification and Cytotoxic Evaluation of Nutmeg (*Myristica fragrans* Houtt.) and Its Adulterants

Suthiwat Khamnuan <sup>1</sup>, Ampai Phrutivorapongkul <sup>1</sup>, Pornsiri Pitchakarn <sup>2</sup>, Pensiri Buacheen <sup>2</sup>, Jirarat Karinchai <sup>2</sup>, Chuda Chittasupho <sup>1</sup>, Mingkwan Na Takuathung <sup>3,6</sup>, Tinnakorn Theansungnoen <sup>4</sup>, Kanika Thongkhao <sup>5</sup>, and Aekkhaluck Intharuksa <sup>1,\*</sup>

Supplementary materials

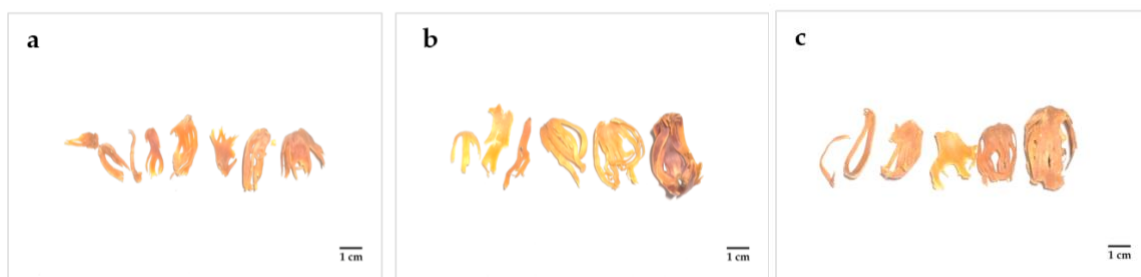

**Figure S1** The arils of authentic nutmeg samples: AA1 (a), AA2 (b), and AA3 (c)

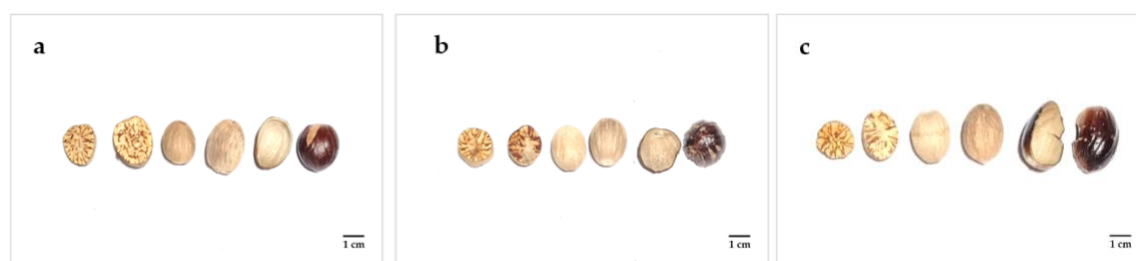

**Figure S2** The seeds of authentic nutmeg samples: AS1 (a), AS2 (b), and AS3 (c)

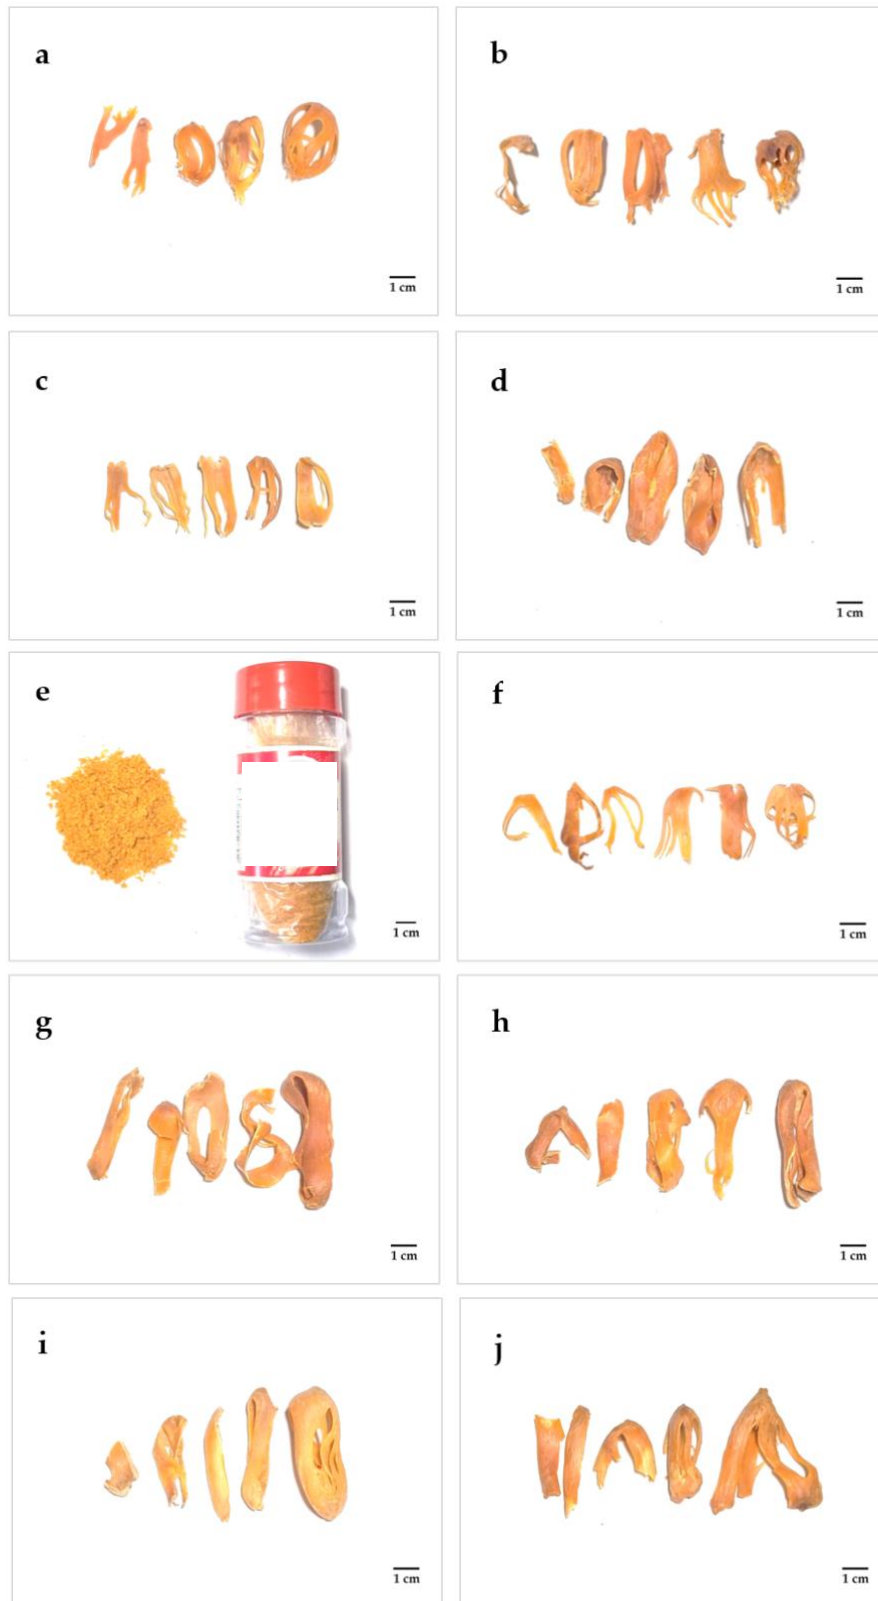

**Figure S3** The commercial dried arils and aril product of nutmeg: PA1 (a), PA2 (b), PA3 (c), PA4 (d), PA5 (e), PA6 (f), PA7 (g), PA8 (h), PA9 (i), and PA10 (j)

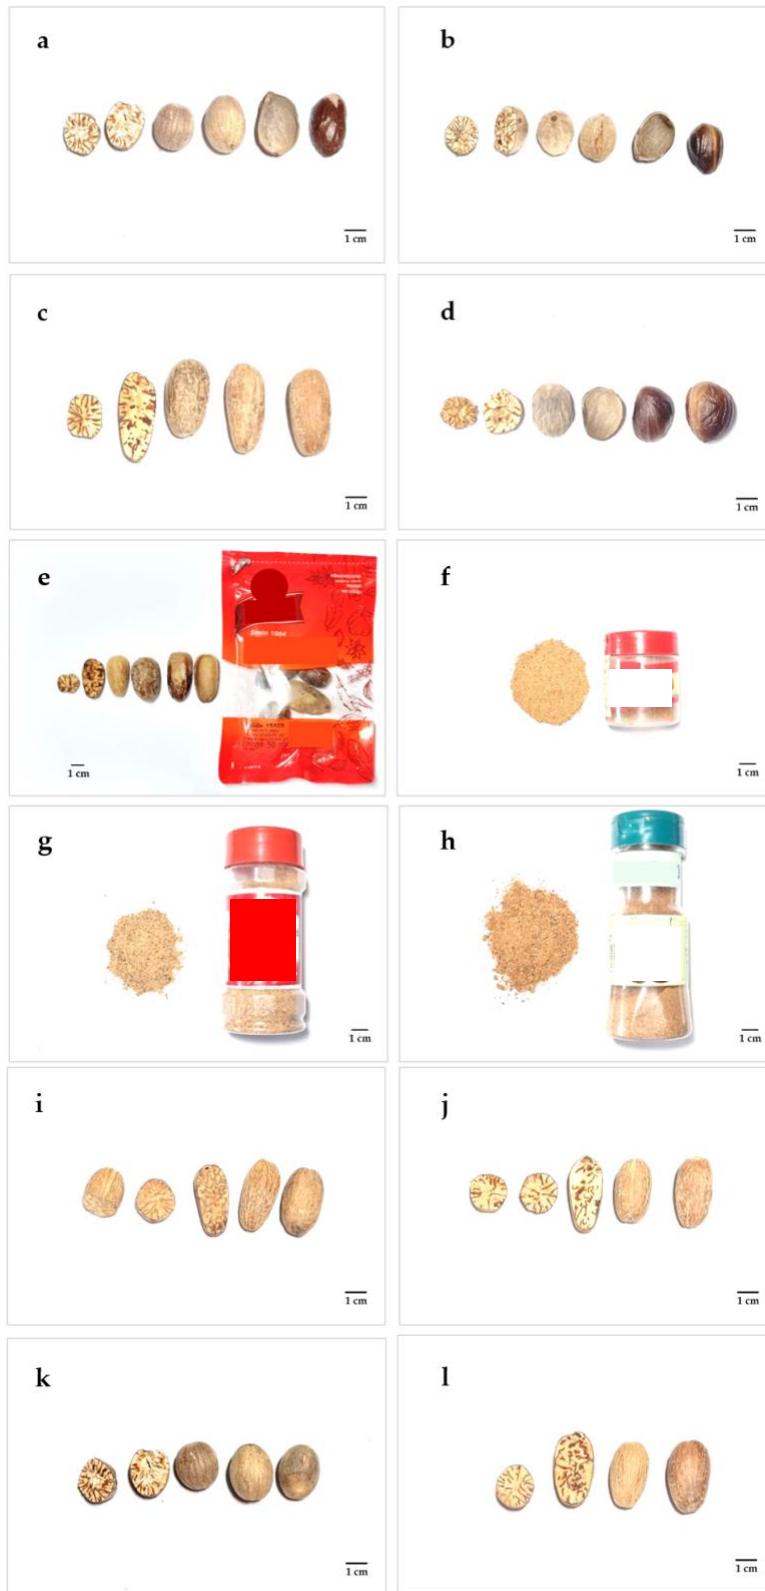

**Figure S4** The commercial dried seeds and seed products of nutmeg: PS1 (a), PS2 (b), PS3 (c), PS4 (d), PS5 (e), PS6 (f), PS7 (g), PS8 (h), PS9 (i), PS10 (j), PS11 (k), and PS12 (l)

```

      ....|....| ....|....| ....|....| ....|....| ....|....|
      10      20      30      40      50
M. fragrans      GGTGCTGTTG AAGCTCTATC AACAAATGGC TAATACTTCG GTATTAGTGT
globose-shaped nutmeg (PS1) GGTGCTGTTG AAGCTCTATC AACAAATGGC TAATACTTCG GTATTAGTGT
oval-shaped nutmeg (PS3)   GCTGCTGTTG AAGCTCTATC AACAAATGGC TAATACTTCG GTATTAGTGT

      ....|....| ....|....| ....|....| ....|....| ....|....|
      60      70      80      90     100
M. fragrans      ATACGAGTCA TTGAAGGATC AGATCAATAC CCAGAAGTGG GTATTGATCT
globose-shaped nutmeg (PS1) ATACGAGTCA TTGAAGGATC AGATCAATAC CCAGAAGTGG GTATTGATCT
oval-shaped nutmeg (PS3)   ATACGAGTCA TTGAAGGATC AGATCAATAC CCACTTCTGG GTATTGATCT

      ....|....| ....|....| ....|....| ....|....| ....|....|
      110     120     130     140     150
M. fragrans      GGTTCACTAG TGGTTTACTC ACATAAGATT TTTTTTTTTC AATTTCAGAA
globose-shaped nutmeg (PS1) GGTTCACTAG TGGTTTACTC ACATAAGATT TTTTTTTTTC AATTTCAGAA
oval-shaped nutmeg (PS3)   GGTTCACTAG TGGTTTACTC ACATAAGA-- TTTTTTTTTC AATTTAAGAA

      ....|....| ....|....| ....|....| ....|....| ....|....|
      160     170     180     190     200
M. fragrans      AATATTAATT ATTTGGTTCA TGATCGAACA TCATACC-TT TTTTTTTTAT
globose-shaped nutmeg (PS1) AATATTAATT ATTTGGTTCA TGATCGAACA TCATACC-TT TTTTTTTTAT
oval-shaped nutmeg (PS3)   AATATTAATT ATTTGGTTCA TGATCGAACA TCATACC-TT TTTTTTTTAT

      ....|....| ....|....| ....|....| ....|....| ....|....|
      210     220     230     240     250
M. fragrans      TTTAACTGAT CTTCAGTTTA TGTACATTCC TAAAATGCAT TTTTTCCTAT
globose-shaped nutmeg (PS1) TTTAACTGAT CTTCAGTTTA TGTACATTCC TAAAATGCAT TTTTTCCTAT
oval-shaped nutmeg (PS3)   TTTAACTGAT CTTCAGTTTA TGTACATTCC TAAAATGAAT TTTTTCCTAT

      ....|....| ....|....| ....|....| ....|....| ....|....|
      260     270     280     290     300
M. fragrans      TGTCAATTTT ATAAAGGGTA TAAATTAGTA TGAAAAAAAA AAAGAAAGAC
globose-shaped nutmeg (PS1) TGTCAATTTT ATAAAGGGTA TAAATTAGTA TGAAAAAAAA AAAGAAAGAC
oval-shaped nutmeg (PS3)   TGTCAATTTT ATAAAGGGTA TAAATTAGTA TG-AAAAAAA AAAGAAAGAC

      ....|....| ....|....| ....|....| ....|....| ....|....|
      310     320     330     340     350
M. fragrans      TAGTAATCTA AAATTTGTGT CTTTAGAAAA GACAAGGGGC GGATGTACCC
globose-shaped nutmeg (PS1) TAGTAATCTA AAATTTGTGT CTTTAGAAAA GACAAGGGGC GGATGTACCC
oval-shaped nutmeg (PS3)   TAGTAATCTA AAATTTGTGT CTTTAGAAAA GACAAGGGGC GGATGTAGCC

      ....|....| ..
      360
M. fragrans      AAGGGGATCA AG
globose-shaped nutmeg (PS1) AAGGGGATCA AG
oval-shaped nutmeg (PS3)   AAGTGGATCA AG

```

**Figure S5** Alignment of *trnH-psbA* region of authentic *M. fragrans*, commercial globose-shaped nutmeg (PS1), and oval-shaped nutmeg (PS3).

**Table S1** Morphological characteristics and size measurements of arils and seeds of authentic *M. fragrans* and commercial nutmeg samples

| Specimen Code      | Sample Typologies | Color            | Odor    | Dimensions (cm) |             |             |
|--------------------|-------------------|------------------|---------|-----------------|-------------|-------------|
|                    |                   |                  |         | Length          | Width       | Thickness   |
| Arils              |                   |                  |         |                 |             |             |
| Authentic samples  |                   |                  |         |                 |             |             |
| AA1                | Dried arils       | Orange           | pungent | 2.60 ± 0.53     | 0.90 ± 0.51 | 0.05 ± 0.01 |
| AA2                | Dried arils       | Yellowish orange | pungent | 3.23 ± 0.60     | 0.75 ± 0.40 | 0.06 ± 0.01 |
| AA3                | Dried arils       | Orange           | pungent | 3.10 ± 0.53     | 1.23 ± 0.76 | 0.04 ± 0.01 |
| Commercial samples |                   |                  |         |                 |             |             |
| PA1                | Dried arils       | Yellowish orange | pungent | 2.73 ± 0.75     | 0.70 ± 0.44 | 0.04 ± 0.01 |
| PA2                | Dried arils       | Yellowish orange | pungent | 2.77 ± 0.68     | 1.37 ± 0.68 | 0.04 ± 0.01 |
| PA3                | Dried arils       | Yellowish orange | pungent | 2.43 ± 0.20     | 0.88 ± 0.49 | 0.05 ± 0.01 |
| PA4                | Dried arils       | Yellowish orange | pungent | 3.95 ± 1.18     | 1.28 ± 0.19 | 0.06 ± 0.00 |
| PA5                | Aril Powder       | Yellowish orange | pungent | -               | -           | -           |
| PA6                | Dried arils       | Yellowish orange | pungent | 2.63 ± 0.51     | 0.98 ± 0.49 | 0.05 ± 0.01 |
| PA7                | Dried arils       | Orange           | pungent | 3.45 ± 0.88     | 1.03 ± 0.38 | 0.06 ± 0.01 |
| PA8                | Dried arils       | Yellowish orange | pungent | 3.68 ± 0.36     | 0.93 ± 0.23 | 0.06 ± 0.01 |
| PA9                | Dried arils       | Yellowish orange | pungent | 4.80 ± 0.18     | 1.00 ± 0.46 | 0.06 ± 0.01 |
| PA10               | Dried arils       | Orange           | pungent | 3.13 ± 0.55     | 0.87 ± 0.55 | 0.05 ± 0.00 |
| Seeds              |                   |                  |         |                 |             |             |
| Authentic samples  |                   |                  |         |                 |             |             |
| AS1                | Dried seeds       | bright brown     | pungent | 1.78 ± 0.48     | 1.40 ± 0.10 | -           |
| AS2                | Dried seeds       | bright brown     | pungent | 2.00 ± 0.30     | 1.45 ± 0.05 | -           |
| AS3                | Dried seeds       | bright brown     | pungent | 2.25 ± 0.22     | 1.57 ± 0.06 | -           |
| Commercial samples |                   |                  |         |                 |             |             |
| PS1                | Dried seeds       | bright brown     | pungent | 1.90 ± 0.37     | 1.57 ± 0.06 | -           |
| PS2                | Dried seeds       | bright brown     | pungent | 2.05 ± 0.57     | 1.60 ± 0.10 | -           |
| PS3                | Dried seeds       | brown            | pungent | 3.78 ± 0.19     | 1.78 ± 0.14 | -           |
| PS4                | Dried seeds       | bright brown     | pungent | 2.03 ± 0.25     | 1.47 ± 0.03 | -           |
| PS5                | Dried seeds       | brown            | pungent | 3.07 ± 0.25     | 1.60 ± 0.10 | -           |
| PS6                | Seed Powders      | bright brown     | pungent | -               | -           | -           |
| PS7                | Seed Powders      | brown            | pungent | -               | -           | -           |
| PS8                | Seed Powders      | bright brown     | pungent | -               | -           | -           |
| PS9                | Dried seeds       | brown            | pungent | 2.38 ± 0.28     | 1.65 ± 0.05 | -           |
| PS10               | Dried seeds       | brown            | pungent | 3.03 ± 0.25     | 1.57 ± 0.15 | -           |
| PS11               | Dried seeds       | brown            | pungent | 2.20 ± 0.10     | 1.23 ± 0.06 | -           |
| PS12               | Dried seeds       | brown            | pungent | 2.92 ± 0.14     | 1.65 ± 0.05 | -           |

**Table S2** Primers used in this study

| Regions          | Primers              | Sequence (5' > 3')                  | Reference |
|------------------|----------------------|-------------------------------------|-----------|
| ITS              | ITS1                 | CCT TAT CAT TTA GAG GAA GGA G       | [1]       |
|                  | ITS4                 | TCC TCC GCT TAT TGA TAT GC          | [2]       |
| <i>matK</i>      | <i>matK</i> -1RKIM-f | ACC CAG TCC ATC TGG AAA TCT TGG TTC | [3]       |
|                  | <i>matK</i> -3FKIM-r | CGT ACA GTA CTT TTG TGT TTA CGA G   | [3]       |
| <i>rbcL</i>      | <i>rbcL</i> 1F       | ATG TCA CCA CAA ACA GAG ACT AAA GC  | [4]       |
|                  | <i>rbcL</i> 724R     | GTA AAA TCA AGT CCA CCG CG          | [4]       |
| <i>trnH-psbA</i> | <i>trnH</i> (GUG)    | CGT AAC AAG GTT TCC GTA GGT GAA     | [5]       |
|                  | <i>psbA</i>          | GTT ATG CAT GAA CGT AAT GCTC        | [5]       |
| <i>trnL-F</i>    | c                    | CGA AAT CGG TAG ACG CTA CG          | [6]       |
|                  | f                    | ATT TGA ACT GGT GAC ACG AG          | [6]       |

**Reference:**

1. Stanford, A.M.; Harden, R.; Parks, C.R. Phylogeny and biogeography of Juglans (Juglandaceae) based on *matK* and ITS sequence data. *American Journal of Botany* **2000**, *87*, 872-882.
2. White, T.J.; Bruns, T.; Lee, S.; Taylor, J. Amplification and direct sequencing of fungal ribosomal RNA genes for phylogenetics. *PCR protocols: a guide to methods and applications* **1990**, *18*, 315-322.
3. MB, H. Four primer pairs for the amplification of chloroplast intergenic regions with intraspecific variation. *Mol Ecol* **1999**, *8*, 521-522.
4. Fay, M.F.; Bayer, C.; Alverson, W.S.; de Bruijn, A.Y.; Chase, M.W. Plastid *rbcL* sequence data indicate a close affinity between *Diegodendron* and *Bixa*. *Taxon* **1998**, *47*, 43-50.
5. Kuzmina, M.L.; Johnson, K.L.; Barron, H.R.; Hebert, P.D. Identification of the vascular plants of Churchill, Manitoba, using a DNA barcode library. *BMC ecology* **2012**, *12*, 1-11.
6. Taberlet, P.; Gielly, L.; Pautou, G.; Bouvet, J. Universal primers for amplification of three non-coding regions of chloroplast DNA. *Plant molecular biology* **1991**, *17*, 1105-1109.

**Table S3** The PCR conditions for DNA amplification of each DNA barcoding regions

| PCR conditions  | DNA barcoding regions |              |              |                  |               |
|-----------------|-----------------------|--------------|--------------|------------------|---------------|
|                 | ITS                   | <i>matK</i>  | <i>rbcL</i>  | <i>trnH-psbA</i> | <i>trnL-F</i> |
| Pre-heating     | 94°C, 2 min           | 94°C, 2 min  | 94°C, 2 min  | 94°C, 2 min      | 94°C, 2 min   |
| Denaturation    | 94°C, 15 s            | 94°C, 15 s   | 94°C, 15 s   | 94°C, 15 s       | 94°C, 15 s    |
| Annealing       | 54°C, 15 s            | 52°C, 15 s   | 52°C, 15 s   | 56°C, 15 s       | 52°C, 15 s    |
| Extension       | 68°C, 45 s            | 68°C, 45 s   | 68°C, 45 s   | 68°C, 45 s       | 68°C, 45 s    |
| Final extension | 68°C, 20 min          | 68°C, 10 min | 68°C, 10 min | 68°C, 20 min     | 68°C, 10 min  |
| Cycle (loops)   | 40                    | 40           | 35           | 40               | 35            |



Table S4 %AUC of the major phytochemicals found in the volatile oil extracted from the representative aril and seed of globose-shaped and oval-shaped nutmegs

| No. | RT   | components                                   | %Area Under the Curve (%AUC) |       |       |       |
|-----|------|----------------------------------------------|------------------------------|-------|-------|-------|
|     |      |                                              | AA1                          | AS1   | PA4   | PS3   |
| 1   | 6.7  | pinene, and terpinen-4-ol                    | 15.68                        | 11.74 | 3.04  | 3.41  |
| 2   | 7.9  | $\beta$ -phellandrene                        | 33.94                        | 30.98 | 18.99 | 27.00 |
| 3   | 9.7  | (5R)-1-methyl-5-(1-methylethenyl)cyclohexene | 7.43                         | 5.89  | 20.29 | 18.71 |
| 4   |      | terpinene                                    | 3.64                         | 2.91  | 2.81  | 2.72  |
| 5   | 15.7 | terpinen-4-ol                                | 6.48                         | 4.22  | 4.34  | 6.93  |
| 6   | 20.4 | safrole                                      | 0.32                         | 6.17  | 33.35 | 19.61 |
| 7   | 30.1 | myristicin                                   | 5.23                         | 3.39  | 0.04  | 1.48  |
